# Supplementary material for: Improved survival in myeloma patients–a nationwide registry study of 4,647 patients ≥75 years treated in Denmark and Sweden
Source: PubMed Central journal article supplement — Haematologica. 2022 Oct 27;108(6):1640–51. doi: 10.3324/haematol.2021.280424 (PMC10230423; doi:10.3324/haematol.2021.280424), 2022-10-27
Supplement: 2021_280424_MOORE_SUPPL.pdf [file 2021_280424_MOORE_SUPPL.pdf]

# Improved survival in myeloma patients—a nationwide registry study of 4,647 patients $\geq 75$ years treated in Denmark and Sweden

Kari Lenita Falck Moore<sup>1,2,3</sup> Ingemar Turesson,<sup>4</sup> Anna Genell,<sup>5</sup> Tobias W. Klausen,<sup>6</sup> Dorota Knut-Bojanowska,<sup>7</sup> Louise Redder,<sup>8</sup> Ingigerdur Sverrisdottir,<sup>9,10</sup> Jonathan Thorsen,<sup>11</sup> Annette J. Vangsted<sup>12#</sup> and Cecilie H. Blimark<sup>9,13#</sup> on behalf of the Nordic Myeloma Study Group

<sup>1</sup>KG Jebsen Center for B-Cell Malignancies, Institute of Clinical Medicine, University of Oslo, Oslo, Norway; <sup>2</sup>Oslo Myeloma Center, Department of hematology, Oslo University Hospital, Oslo Norway; <sup>3</sup>Department of Hematology and Oncology, Stavanger University Hospital, Stavanger, Norway; <sup>4</sup>Department of Hematology, Skåne University Hospital Malmö/Lund, Malmö, Sweden; <sup>5</sup>Regional Cancer Center of the Western Region, Sahlgrenska University Hospital, Gothenburg, Sweden; <sup>6</sup>Department of Hematology, Herlev Hospital, Herlev, Denmark; <sup>7</sup>Department of Hematology, Uddevalla Hospital, Uddevalla, Sweden; <sup>8</sup>Department of Hematology, Odense University Hospital, Odense, Denmark; <sup>9</sup>Department of Hematology, Sahlgrenska University Hospital, Gothenburg, Sweden; <sup>10</sup>Faculty of Medicine, University of Iceland, Reykjavik, Iceland; <sup>11</sup>Copenhagen Prospective Studies on Asthma in Childhood, Herlev and Gentofte Hospital, University of Copenhagen, Denmark; <sup>12</sup>Department of Hematology, Rigshospitalet, Copenhagen, Denmark and <sup>13</sup>Institution of Internal Medicine, Sahlgrenska Academy, University of Gothenburg, Gothenburg, Sweden.

*#AJV and CHB contributed equally as co-senior authors.*

**Correspondence:** K.L.F. Moore.  
[k.l.f.moore@medisin.uio.no](mailto:k.l.f.moore@medisin.uio.no)

**Received:** January 10, 2022.

**Accepted:** August 16, 2022.

**Prepublished:** October 27, 2022.

<https://doi.org/10.3324/haematol.2021.280424>

©2023 Ferrata Storti Foundation

Published under a CC BY-NC license

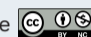

## Supplementary data

| <b>Supplementary Table S1: Prevalence of plasma cell diseases in Denmark and Sweden (data from NORDCAN)</b> |         |       |         |       |
|-------------------------------------------------------------------------------------------------------------|---------|-------|---------|-------|
|                                                                                                             | Denmark |       | Sweden  |       |
| Years                                                                                                       | Females | Males | Females | Males |
| 1963                                                                                                        | 3.5     | 3.8   |         |       |
| 1964                                                                                                        | 4.1     | 4.0   |         |       |
| 1965                                                                                                        | 4.6     | 4.7   |         |       |
| 1966                                                                                                        | 5.0     | 5.4   |         |       |
| 1967                                                                                                        | 5.1     | 5.7   |         |       |
| 1968                                                                                                        | 5.2     | 6.0   |         |       |
| 1969                                                                                                        | 5.6     | 6.4   |         |       |
| 1970                                                                                                        | 5.4     | 5.8   |         |       |
| 1971                                                                                                        | 5.2     | 6.3   |         |       |
| 1972                                                                                                        | 5.0     | 5.8   |         |       |
| 1973                                                                                                        | 5.5     | 5.9   |         |       |
| 1974                                                                                                        | 5.6     | 5.9   |         |       |
| 1975                                                                                                        | 6.6     | 6.3   |         |       |
| 1976                                                                                                        | 6.9     | 7.3   |         |       |
| 1977                                                                                                        | 8.0     | 7.7   |         |       |
| 1978                                                                                                        | 7.9     | 8.6   |         |       |
| 1979                                                                                                        | 8.6     | 9.1   |         |       |
| 1980                                                                                                        | 8.9     | 8.6   | 16.8    | 17.8  |
| 1981                                                                                                        | 9.0     | 9.8   | 17.1    | 19.6  |
| 1982                                                                                                        | 9.4     | 10.5  | 17.3    | 20.1  |
| 1983                                                                                                        | 10.1    | 10.3  | 18.8    | 20.9  |
| 1984                                                                                                        | 10.4    | 10.8  | 20.2    | 21.5  |
| 1985                                                                                                        | 9.9     | 11.1  | 19.9    | 22.2  |
| 1986                                                                                                        | 9.5     | 11.1  | 19.7    | 23.1  |
| 1987                                                                                                        | 10.5    | 12.2  | 20.4    | 23.4  |
| 1988                                                                                                        | 11.1    | 12.2  | 20.3    | 22.9  |
| 1989                                                                                                        | 11.5    | 12.0  | 21.3    | 23.5  |
| 1990                                                                                                        | 11.4    | 12.0  | 21.1    | 23.6  |
| 1991                                                                                                        | 12.1    | 13.1  | 21.5    | 23.7  |
| 1992                                                                                                        | 13.3    | 13.5  | 20.8    | 24.1  |
| 1993                                                                                                        | 14.1    | 13.9  | 21.3    | 24.0  |
| 1994                                                                                                        | 14.0    | 14.5  | 21.5    | 24.4  |
| 1995                                                                                                        | 13.7    | 14.3  | 21.4    | 24.5  |
| 1996                                                                                                        | 14.0    | 15.3  | 21.4    | 24.8  |
| 1997                                                                                                        | 14.2    | 15.2  | 21.8    | 24.2  |
| 1998                                                                                                        | 14.7    | 15.0  | 22.3    | 24.9  |
| 1999                                                                                                        | 15.0    | 15.7  | 23.2    | 24.9  |
| 2000                                                                                                        | 16.0    | 16.0  | 23.3    | 26.0  |
| 2001                                                                                                        | 16.1    | 17.3  | 23.7    | 26.2  |
| 2002                                                                                                        | 16.0    | 18.4  | 23.8    | 26.4  |

|                                             |      |      |      |      |
|---------------------------------------------|------|------|------|------|
| 2003                                        | 15.8 | 19.6 | 24.0 | 26.4 |
| 2004                                        | 17.4 | 20.4 | 24.5 | 27.1 |
| 2005                                        | 19.3 | 22.8 | 24.9 | 27.7 |
| 2006                                        | 20.7 | 23.5 | 25.4 | 28.6 |
| 2007                                        | 21.8 | 25.9 | 25.8 | 29.6 |
| 2008                                        | 22.9 | 28.4 | 26.9 | 31.6 |
| 2009                                        | 25.3 | 30.3 | 27.1 | 32.3 |
| 2010                                        | 26.2 | 32.0 | 28.1 | 34.1 |
| 2011                                        | 27.6 | 34.2 | 29.5 | 36.0 |
| 2012                                        | 29.1 | 36.0 | 29.8 | 37.3 |
| 2013                                        | 31.5 | 38.3 | 30.4 | 39.0 |
| 2014                                        | 34.6 | 40.2 | 31.3 | 40.7 |
| 2015                                        | 36.3 | 43.5 | 31.8 | 42.4 |
| 2016                                        | 38.3 | 46.9 | 33.0 | 43.8 |
| 2017                                        | 41.5 | 50.0 | 35.5 | 46.5 |
| 2018                                        | 44.2 | 53.2 | 36.6 | 48.3 |
| Prevalence is measured in cases per 100 000 |      |      |      |      |

| Supplementary Table S2: Treatment regimes in Denmark and Sweden for patients ≥ 75 years |                    |                  |                    |                  |
|-----------------------------------------------------------------------------------------|--------------------|------------------|--------------------|------------------|
| Regime                                                                                  | Denmark            |                  | Sweden             |                  |
|                                                                                         | All years<br>N (%) | 2017-18<br>N (%) | All years<br>N (%) | 2017-19<br>N (%) |
| VRd                                                                                     | 65 (4.1)           | 25 (10.3)        | 56 (2.3)           | 53 (9.1)         |
| VTd                                                                                     | 27 (1.7)           | 2 (0.8)          | 42 (1.7)           | 29 (5.0)         |
| VCd                                                                                     | 56 (3.5)           | 21 (8.6)         | 144 (6.0)          | 31 (5.3)         |
| MPV                                                                                     | 222 (14.0)         | 75 (30.9)        | 427 (17.7)         | 173 (29.8)       |
| MPR                                                                                     | 19 (1.2)           | 0 (0.0)          | 22 (0.9)           | 1 (0.2)          |
| MPT                                                                                     | 185 (11.7)         | 2 (0.8)          | 421 (17.5)         | 22 (3.8)         |
| Vd                                                                                      | 169 (10.7)         | 39 (16.0)        | 368 (15.3)         | 138 (23.8)       |
| Rd                                                                                      | 79 (5.0)           | 29 (11.9)        | 92 (3.8)           | 73 (12.6)        |
| MP                                                                                      | 403 (25.5)         | 7 (2.9)          | 674 (28.0)         | 37 (6.4)         |
| CTd                                                                                     | 12 (0.8)           | 0 (0.0)          | 25 (1.0)           | 1 (0.2)          |
| Cd                                                                                      | 50 (3.2)           | 6 (2.5)          | 43 (1.8)           | 7 (1.2)          |
| Td                                                                                      | 62 (3.9)           | 2 (0.8)          | 34 (1.4)           | 9 (1.6)          |
| Td-ixa                                                                                  | 4 (0.3)            | 0 (0.0)          | 8 (0.3)            | 0 (0.0)          |
| Steroid mono                                                                            | 69 (4.4)           | 6 (2.5)          | 38 (1.6)           | 2 (0.3)          |
| Other                                                                                   | 74 (4.7)           | 13 (5.3)         | 14 (0.6)           | 4 (0.7)          |
| None                                                                                    | 85 (5.4)           | 16 (6.6)         |                    |                  |
| Missing                                                                                 | 107                | 42               | 52 (2.0)           | 28 (4.4)         |

N; number of patients. VRd; bortezomib, lenalidomide, dexamethasone. VTd; bortezomib, thalidomide, dexamethasone. VCd; bortezomib, cyclophosphamide, dexamethasone. MPV; melphalan, prednisolone, bortezomib. MPR; melphalan, prednisolone, lenalidomide. MPT; melphalan, prednisolone, thalidomide. Vd; bortezomib, dexamethasone. Rd; lenalidomide, dexamethasone. MP; melphalan, prednisolone. CTd; cyclophosphamide, thalidomide, dexamethasone. Cd; cyclophosphamide, dexamethasone. Td; thalidomide, dexamethasone. Td-ixa; thalidomide, dexamethasone, ixazomib. Mono; monotherapy.

**Supplementary Table S3: Proportion of patients receiving IMiD and/or proteasome inhibitor as part of first line treatment by age group and country**

| Year of diagnosis | Sweden              |                     | Denmark             |                     |
|-------------------|---------------------|---------------------|---------------------|---------------------|
|                   | < 75 years<br>N (%) | ≥ 75 years<br>N (%) | < 75 years<br>N (%) | ≥ 75 years<br>N (%) |
| 2005              |                     |                     | 19 (12.3)           | 15 (16.5)           |
| 2006              |                     |                     | 26 (13.9)           | 29 (29.3)           |
| 2007              |                     |                     | 54 (30.0)           | 27 (22.7)           |
| 2008              | 131 (43.7)          | 52 (29.9)           | 57 (29.4)           | 41 (41.8)           |
| 2009              | 222 (76.6)          | 75 (36.2)           | 138 (65.1)          | 46 (43.4)           |
| 2010              | 283 (90.7)          | 104 (49.1)          | 169 (84.5)          | 55 (56.1)           |
| 2011              | 326 (91.1)          | 113 (57.9)          | 193 (91.0)          | 52 (53.1)           |
| 2012              | 335 (94.6)          | 129 (58.6)          | 152 (80.9)          | 63 (55.8)           |
| 2013              | 327 (94.5)          | 144 (70.2)          | 180 (83.7)          | 71 (62.3)           |
| 2014              | 319 (91.4)          | 160 (73.1)          | 203 (93.1)          | 68 (67.3)           |
| 2015              | 355 (98.6)          | 177 (85.1)          | 194 (91.5)          | 97 (75.8)           |
| 2016              | 350 (97.5)          | 180 (85.3)          | 207 (94.1)          | 112 (80.0)          |
| 2017              | 381 (96.9)          | 211 (87.6)          | 229 (95.0)          | 107 (80.5)          |
| 2018              | 303 (98.1)          | 198 (93)            | 184 (94.8)          | 90 (81.8)           |
| 2019              | 219 (98.2)          | 147 (95.5)          | 34 (87.2)           | 31 (93.9)           |
| Sum               | 3551 (89.8)         | 1690 (68.7)         | 2039 (71.1)         | 904 (57.2)          |

IMiD; immunomodulatory imide drugs. N; number of patients.

|      | Swedish patients < 75 years |             |             | Swedish patients ≥ 75 years |             |             | Danish patients < 75 years |             |             | Danish patients ≥ 75 years |             |             |
|------|-----------------------------|-------------|-------------|-----------------------------|-------------|-------------|----------------------------|-------------|-------------|----------------------------|-------------|-------------|
|      | ≥VGPR<br>N (%)              | PR<br>N (%) | NR<br>N (%) | ≥VGPR<br>N (%)              | PR<br>N (%) | NR<br>N (%) | ≥ VGPR<br>N (%)            | PR<br>N (%) | NR<br>N (%) | ≥VGPR<br>N (%)             | PR<br>N (%) | NR<br>N (%) |
| 2005 |                             |             |             |                             |             |             | 37 (25.9)                  | 67 (46.9)   | 39 (27.3)   | 9 (11.8)                   | 23 (30.3)   | 44 (57.9)   |
| 2006 |                             |             |             |                             |             |             | 50 (28.2)                  | 83 (46.9)   | 44 (24.9)   | 10 (11.9)                  | 33 (39.3)   | 41 (48.8)   |
| 2007 |                             |             |             |                             |             |             | 63 (37.3)                  | 58 (34.3)   | 48 (28.4)   | 18 (17.1)                  | 35 (33.3)   | 52 (49.5)   |
| 2008 | 128 (44.3)                  | 123 (42.6)  | 38 (13.1)   | 27 (19.7)                   | 58 (42.3)   | 52 (38)     | 94 (51.9)                  | 46 (25.4)   | 41 (22.7)   | 15 (17.4)                  | 29 (33.7)   | 42 (48.8)   |
| 2009 | 137 (49.6)                  | 107 (38.8)  | 32 (11.6)   | 41 (24.4)                   | 77 (45.8)   | 50 (29.8)   | 109 (55.6)                 | 42 (21.4)   | 45 (23.0)   | 11 (12.2)                  | 38 (42.2)   | 41 (45.6)   |
| 2010 | 180 (60.6)                  | 86 (29)     | 31 (10.4)   | 42 (26.8)                   | 64 (40.8)   | 51 (32.5)   | 109 (56.5)                 | 45 (23.3)   | 39 (20.2)   | 18 (20.0)                  | 31 (34.4)   | 41 (45.6)   |
| 2011 | 197 (57.9)                  | 98 (28.8)   | 45 (13.2)   | 37 (21.5)                   | 72 (41.9)   | 63 (36.6)   | 128 (62.1)                 | 46 (22.3)   | 32 (15.5)   | 16 (17.6)                  | 29 (31.9)   | 46 (50.5)   |
| 2012 | 197 (58.8)                  | 104 (31)    | 34 (10.1)   | 49 (26.2)                   | 78 (41.7)   | 60 (32.1)   | 101 (55.2)                 | 46 (25.1)   | 36 (19.7)   | 17 (17.0)                  | 38 (38.0)   | 45 (45.0)   |
| 2013 | 207 (63.5)                  | 83 (25.5)   | 36 (11)     | 46 (25.8)                   | 78 (43.8)   | 54 (30.3)   | 115 (56.1)                 | 50 (24.4)   | 40 (19.5)   | 25 (23.8)                  | 43 (41.0)   | 37 (35.2)   |
| 2014 | 207 (61.8)                  | 82 (24.5)   | 46 (13.7)   | 64 (34.2)                   | 84 (44.9)   | 39 (20.9)   | 123 (58.6)                 | 56 (26.7)   | 31 (14.8)   | 29 (32.6)                  | 26 (29.2)   | 34 (38.2)   |
| 2015 | 206 (60.2)                  | 102 (29.8)  | 34 (9.9)    | 58 (31.4)                   | 78 (42.2)   | 49 (26.5)   | 129 (62.3)                 | 53 (25.6)   | 25 (12.1)   | 38 (32.8)                  | 40 (34.5)   | 38 (32.8)   |
| 2016 | 234 (68.8)                  | 87 (25.6)   | 19 (5.6)    | 74 (39.4)                   | 64 (34)     | 50 (26.6)   | 121 (57.6)                 | 59 (28.1)   | 30 (14.3)   | 49 (38.6)                  | 26 (20.5)   | 52 (40.9)   |
| 2017 | 255 (68.4)                  | 79 (21.2)   | 39 (10.5)   | 80 (38.3)                   | 81 (38.8)   | 48 (23)     | 142 (60.9)                 | 61 (26.2)   | 30 (12.9)   | 44 (37.3)                  | 36 (30.5)   | 38 (32.2)   |
| 2018 | 219 (77.7)                  | 46 (16.3)   | 17 (6)      | 74 (40.4)                   | 81 (44.3)   | 28 (15.3)   | 119 (64.0)                 | 34 (18.3)   | 33 (17.7)   | 23 (24.2)                  | 26 (27.4)   | 46 (48.4)   |
| 2019 | 149 (71)                    | 42 (20)     | 19 (9)      | 62 (45.3)                   | 52 (38)     | 23 (16.8)   | 19 (52.8)                  | 6 (16.7)    | 11 (30.6)   | 12 (40.0)                  | 8 (26.7)    | 10 (33.3)   |
| Sum  | 2316 (61.8)                 | 1039 (27.7) | 390 (10.4)  | 654 (31.3)                  | 867 (41.5)  | 567 (27.2)  | 1459 (53.3)                | 752 (27.5)  | 524 (19.2)  | 334 (23.8)                 | 461 (32.9)  | 607 (43.3)  |

VGPR; very good partial response. PR; partial response. NR; no response. N; Number of patients.  
Subgroup: Patients with 1-year follow-up report form who were treated and treatment data and response rate were reported.

**Supplementary Table S5: Median observed and relative survival for myeloma patients by age group and country**

| Year      | Swedish patients < 75 years |                  |                 |                  | Swedish patients ≥ 75 years |                  |                 |                  |
|-----------|-----------------------------|------------------|-----------------|------------------|-----------------------------|------------------|-----------------|------------------|
|           | Median OS (mos)             | OS, 95% CI (mos) | Median RS (mos) | RS, 95% CI (mos) | Median OS (mos)             | OS, 95% CI (mos) | Median RS (mos) | RS, 95% CI (mos) |
| 2008-2009 | 64.6                        | 54.1-71.3        | 68.3            | 61.4-77.4        | 20.3                        | 17.9 - 24.2      | 24.5            | 20.6 - 29.6      |
| 2010-2011 | 63.7                        | 59.5-70.2        | 69.0            | 62.4-84.4        | 21.5                        | 18.8 - 23.9      | 24.6            | 22.4 - 29.8      |
| 2012-2013 | 73.4                        | 65.9-80.2        | 80.2            | 72.8-89.8        | 22.1                        | 18.6 - 27.2      | 29.2            | 23.6 - 33.4      |
| 2014-2015 | 73.8                        | 68.0-81.6        | 81.0            | 73.9- NR         | 27.8                        | 23.5 - 31.4      | 34.1            | 29.8 - 40.2      |
| 2016-2017 | NR                          | NR-NR            | NR              | NR-NR            | 30.5                        | 27.0 - 35.4      | 41.6            | 34.2 - 47.6      |
| 2018-2019 | NR                          | NR-NR            | NR              | NR-NR            | 34.1                        | 27.6 - 36.5      | NR              | 34.9 - NR        |
|           |                             |                  |                 |                  |                             |                  |                 |                  |
| Year      | Danish patients < 75 years  |                  |                 |                  | Danish patients ≥ 75 years  |                  |                 |                  |
|           | Median OS (mos)             | OS, 95% CI (mos) | Median RS (mos) | RS, 95% CI (mos) | Median OS (mos)             | OS, 95% CI (mos) | Median RS (mos) | RS, 95% CI (mos) |
| 2005-2007 | 49.7                        | 45.8 - 56.5      | 54.1            | 47.8 - 63.2      | 19.7                        | 14.9 - 23.2      | 24.6            | 19.8-33.8        |
| 2008-2010 | 53.9                        | 49.0 - 60.4      | 58.9            | 52.8 - 66.8      | 20.9                        | 17.4 - 25.2      | 26.0            | 21.7-32.3        |
| 2011-2012 | 65.9                        | 59.2 - 75.2      | 74.8            | 64.7 - 87.8      | 19.8                        | 13.0 - 26.5      | 23.8            | 18.6-39.8        |
| 2013-2014 | 72.8                        | 61.4 - NR        | 85.1            | 71.8 - NR        | 23.9                        | 17.9 - 32.3      | 34.0            | 23.9-43.2        |
| 2015-2016 | NR                          | NR-NR            | NR              | NR-NR            | 29.0                        | 24.0 - 33.6      | 36.1            | 31.2-48.9        |
| 2017-     | NR                          | NR-NR            | NR              | NR-NR            | 29.8                        | 24.9 - NR        | NR              | 32.3- NR         |

CI; confidence interval. Mos; months. NR; not reached. OS; overall survival. RS; relative survival.

| Supplementary Table S6: Observed and relative survival at 6 months, 1 year and 3 years by age group and country |                             |                   |             |                   |             |                             |             |                   |             |
|-----------------------------------------------------------------------------------------------------------------|-----------------------------|-------------------|-------------|-------------------|-------------|-----------------------------|-------------|-------------------|-------------|
|                                                                                                                 | Swedish patients < 75 years |                   |             |                   |             | Swedish patients ≥ 75 years |             |                   |             |
| Time period                                                                                                     | Survival at (years)         | Obs. survival (%) | 95% CI (%)  | Rel. survival (%) | 95% CI (%)  | Obs. survival (%)           | 95% CI (%)  | Rel. survival (%) | 95% CI (%)  |
| 2008-2009                                                                                                       | 0.5                         | 94.7              | 92.9-96.5   | 95.1              | 93.4-96.9   | 75.7                        | 71.7 - 79.9 | 78.2              | 74.1 - 82.5 |
| 2010-2011                                                                                                       | 0.5                         | 93.0              | 91.1-94.9   | 93.5              | 91.7-95.4   | 76.7                        | 72.9 - 80.7 | 79.0              | 75.1 - 83.1 |
| 2012-2013                                                                                                       | 0.5                         | 94.5              | 92.9-96.2   | 95.0              | 93.3-96.6   | 77.9                        | 74.2 - 81.7 | 80.5              | 76.7 - 84.4 |
| 2014-2015                                                                                                       | 0.5                         | 93.3              | 91.6-95.1   | 93.8              | 92.0-95.6   | 77.6                        | 74.0 - 81.3 | 80.1              | 76.5 - 84.0 |
| 2016-2017                                                                                                       | 0.5                         | 95.0              | 93.5-96.5   | 95.5              | 94.0-97.0   | 81.6                        | 78.4 - 85.0 | 83.9              | 80.6 - 87.4 |
| 2018-2019                                                                                                       | 0.5                         | 94.8              | 93.3-96.4   | 95.2              | 93.7-96.8   | 80.7                        | 77.5 - 84.0 | 83.2              | 80.0 - 86.6 |
| 2008-2009                                                                                                       | 1.0                         | 88.6              | 86.1-91.1   | 89.4              | 86.9-92.0   | 65.3                        | 61.0 - 70.0 | 69.4              | 64.8 - 74.4 |
| 2010-2011                                                                                                       | 1.0                         | 88.2              | 85.8-90.5   | 89.1              | 86.8-91.5   | 62.9                        | 58.6 - 67.5 | 66.7              | 62.2 - 71.6 |
| 2012-2013                                                                                                       | 1.0                         | 89.1              | 86.8-91.4   | 89.9              | 87.6-92.3   | 65.5                        | 61.4 - 70.0 | 69.9              | 65.5 - 74.7 |
| 2014-2015                                                                                                       | 1.0                         | 89.2              | 87.0-91.4   | 90.1              | 87.9-92.4   | 68.1                        | 64.2 - 72.3 | 72.2              | 68.0 - 76.6 |
| 2016-2017                                                                                                       | 1.0                         | 91.8              | 89.9-93.7   | 92.7              | 90.8-94.6   | 73.8                        | 70.2 - 77.7 | 77.9              | 74.0 - 81.9 |
| 2018-2019                                                                                                       | 1.0                         | 91.8              | 89.8-93.8   | 92.7              | 90.7-94.7   | 72.1                        | 68.5 - 75.8 | 76.4              | 72.6 - 80.3 |
| 2008-2009                                                                                                       | 3.0                         | 67.0              | 63.4-70.8   | 69.2              | 65.4-73.1   | 30.9                        | 26.8 - 35.6 | 37.0              | 32.1 - 42.6 |
| 2010-2011                                                                                                       | 3.0                         | 69.4              | 66.1-72.9   | 71.7              | 68.3-75.2   | 32.4                        | 28.4 - 37.1 | 38.9              | 34.0 - 44.4 |
| 2012-2013                                                                                                       | 3.0                         | 71.7              | 68.5-75.1   | 74.0              | 70.7-77.5   | 34.5                        | 30.4 - 39.0 | 42.1              | 37.2 - 47.7 |
| 2014-2015                                                                                                       | 3.0                         | 73.2              | 70.1-76.4   | 75.6              | 72.4-78.9   | 41.1                        | 37.0 - 45.6 | 48.6              | 43.8 - 54.0 |
| 2016-2017                                                                                                       | 3.0                         | 79.0              | 76.2-81.9   | 81.6              | 78.7-84.5   | 45.2                        | 41.1 - 49.6 | 53.6              | 48.8 - 58.8 |
| 2018-2019                                                                                                       | 3.0                         | 79.4              | 76.0-82.9   | 82.1              | 78.6-85.7   | 44.3                        | 39.0 - 50.2 | 52.5              | 46.3 - 59.5 |
|                                                                                                                 | Danish patients < 75 years  |                   |             |                   |             | Danish patients ≥ 75 years  |             |                   |             |
| Time period                                                                                                     | Survival at (years)         | Obs. survival (%) | 95% CI (%)  | Rel. survival (%) | 95% CI (%)  | Obs. survival (%)           | 95% CI (%)  | Rel. survival (%) | 95% CI (%)  |
| 2005-2007                                                                                                       | 0.5                         | 84.9              | 81.9 - 88.0 | 85.5              | 82.5 - 88.6 | 72.2                        | 67.4 - 77.3 | 75.0              | 70.0 - 80.3 |
| 2008-2010                                                                                                       | 0.5                         | 88.0              | 85.5 - 90.6 | 88.6              | 86.1 - 91.3 | 73.7                        | 68.9 - 78.8 | 76.1              | 71.2 - 81.4 |
| 2011-2012                                                                                                       | 0.5                         | 91.3              | 88.6 - 94.1 | 91.9              | 89.2 - 94.7 | 66.2                        | 60.2 - 72.8 | 68.4              | 62.2 - 75.2 |
| 2013-2014                                                                                                       | 0.5                         | 92.0              | 89.5 - 94.6 | 92.6              | 90.1 - 95.2 | 73.3                        | 67.8 - 79.3 | 75.7              | 70.0 - 82.0 |
| 2015-2016                                                                                                       | 0.5                         | 93.2              | 90.9 - 95.6 | 93.7              | 91.4 - 96.1 | 78.6                        | 73.9 - 83.5 | 81.1              | 76.2 - 86.2 |
| 2017-                                                                                                           | 0.5                         | 94.4              | 92.5 - 96.2 | 95.0              | 93.1 - 96.9 | 75.2                        | 70.8 - 79.9 | 77.8              | 73.2 - 82.7 |
| 2005-2007                                                                                                       | 1.0                         | 80.7              | 77.4 - 84.1 | 81.8              | 78.5 - 85.3 | 59.1                        | 53.9 - 64.8 | 63.5              | 57.9 - 69.7 |
| 2008-2010                                                                                                       | 1.0                         | 82.1              | 79.1 - 85.2 | 83.3              | 80.3 - 86.4 | 64.5                        | 59.3 - 70.1 | 69.1              | 63.6 - 75.2 |
| 2011-2012                                                                                                       | 1.0                         | 86.5              | 83.3 - 89.9 | 87.7              | 84.4 - 91.1 | 57.9                        | 51.6 - 64.8 | 61.6              | 55.0 - 69.1 |
| 2013-2014                                                                                                       | 1.0                         | 86.8              | 83.7 - 90.0 | 87.8              | 84.7 - 91.1 | 63.1                        | 57.1 - 69.7 | 66.9              | 60.5 - 74.0 |
| 2015-2016                                                                                                       | 1.0                         | 90.5              | 87.8 - 93.2 | 91.5              | 88.8 - 94.3 | 69.6                        | 64.5 - 75.2 | 74.2              | 68.6 - 80.2 |
| 2017-                                                                                                           | 1.0                         | 90.4              | 88.0 - 92.8 | 91.6              | 89.1 - 94.0 | 68.6                        | 63.8 - 73.7 | 73.4              | 68.2 - 78.9 |
| 2005-2007                                                                                                       | 3.0                         | 61.6              | 57.5 - 65.9 | 64.2              | 60.0 - 68.7 | 32.3                        | 27.5 - 37.9 | 40.1              | 34.0 - 47.2 |
| 2008-2010                                                                                                       | 3.0                         | 62.9              | 59.2 - 66.8 | 65.7              | 61.8 - 69.8 | 33.6                        | 28.6 - 39.3 | 41.5              | 35.3 - 48.8 |
| 2011-2012                                                                                                       | 3.0                         | 70.6              | 66.3 - 75.2 | 73.6              | 69.0 - 78.4 | 36.1                        | 30.2 - 43.1 | 44.1              | 36.9 - 52.8 |
| 2013-2014                                                                                                       | 3.0                         | 70.8              | 66.7 - 75.2 | 73.6              | 69.3 - 78.2 | 39.1                        | 33.2 - 46.0 | 48.2              | 40.8 - 56.8 |
| 2015-2016                                                                                                       | 3.0                         | 78.2              | 74.4 - 82.1 | 81.1              | 77.2 - 85.2 | 40.7                        | 35.3 - 46.9 | 50.0              | 43.4 - 57.7 |
| 2017-                                                                                                           | 3.0                         | 80.8              | 77.1 - 84.7 | 84.3              | 80.4 - 88.4 | 44.1                        | 37.0 - 52.6 | 55.4              | 46.7 - 65.6 |

CI; confidence interval. Obs. survival; observed survival. Rel. survival; relative survival.

| Supplementary Table S7: Observed and relative survival at 6 months, 1 year and 3 years by 3 age groups and country |                     |        |             |        |             |                              |             |        |             |                             |             |        |             |
|--------------------------------------------------------------------------------------------------------------------|---------------------|--------|-------------|--------|-------------|------------------------------|-------------|--------|-------------|-----------------------------|-------------|--------|-------------|
| Swedish patients <75 years                                                                                         |                     |        |             |        |             | Swedish patients 75-84 years |             |        |             | Swedish patients ≥ 85 years |             |        |             |
|                                                                                                                    | Survival at (years) | OS (%) | 95% CI (%)  | RS (%) | 95% CI (%)  | OS (%)                       | 95% CI (%)  | RS (%) | 95% CI (%)  | OS (%)                      | 95% CI (%)  | RS (%) | 95% CI (%)  |
| 008-2009                                                                                                           | 0.5                 | 94.7   | 92.9-96.5   | 95.1   | 93.4-96.9   | 79.7                         | 75.5 - 84.1 | 81.7   | 77.5 - 86.2 | 60.7                        | 51.3 - 71.7 | 64.6   | 54.7 - 76.2 |
| 2010-2011                                                                                                          | 0.5                 | 93.0   | 91.1-94.9   | 93.5   | 91.7-95.4   | 82.5                         | 78.5 - 86.6 | 84.3   | 80.3 - 88.5 | 58.3                        | 49.7 - 68.4 | 62.0   | 52.9 - 72.6 |
| 2012-2013                                                                                                          | 0.5                 | 94.5   | 92.9-96.2   | 95.0   | 93.3-96.6   | 83.1                         | 79.1 - 87.3 | 84.9   | 80.9 - 89.2 | 66.2                        | 58.9 - 74.4 | 70.3   | 62.7 - 79.0 |
| 2014-2015                                                                                                          | 0.5                 | 93.3   | 91.6-95.1   | 93.8   | 92.0-95.6   | 82.7                         | 79.0 - 86.6 | 84.5   | 80.8 - 88.5 | 61.8                        | 53.8 - 71.0 | 66.2   | 57.7 - 76.0 |
| 2016-2017                                                                                                          | 0.5                 | 95.0   | 93.5-96.5   | 95.5   | 94.0-97.0   | 86.8                         | 83.5 - 90.1 | 88.5   | 85.1 - 91.9 | 65.4                        | 57.6 - 74.2 | 69.4   | 61.2 - 78.7 |
| 2018-2019                                                                                                          | 0.5                 | 94.8   | 93.3-96.4   | 95.2   | 93.7-96.8   | 82.9                         | 79.5 - 86.5 | 84.5   | 81.0 - 88.1 | 73.8                        | 66.8 - 81.4 | 78.7   | 71.5 - 86.6 |
| 008-2009                                                                                                           | 1.0                 | 88.6   | 86.1-91.1   | 89.4   | 86.9-92.0   | 71.6                         | 67.0 - 76.6 | 75.1   | 70.3 - 80.3 | 41.6                        | 32.5 - 53.2 | 47.0   | 36.8 - 59.9 |
| 2010-2011                                                                                                          | 1.0                 | 88.2   | 85.8-90.5   | 89.1   | 86.8-91.5   | 69.0                         | 64.3 - 74.1 | 72.1   | 67.2 - 77.4 | 43.5                        | 35.1 - 53.9 | 49.2   | 39.8 - 60.9 |
| 2012-2013                                                                                                          | 1.0                 | 89.1   | 86.8-91.4   | 89.9   | 87.6-92.3   | 72.3                         | 67.6 - 77.3 | 75.6   | 70.7 - 80.8 | 50.3                        | 42.8 - 59.2 | 57.0   | 48.5 - 66.9 |
| 2014-2015                                                                                                          | 1.0                 | 89.2   | 87.0-91.4   | 90.1   | 87.9-92.4   | 74.7                         | 70.5 - 79.3 | 77.8   | 73.4 - 82.5 | 48.0                        | 39.9 - 57.7 | 53.8   | 44.9 - 64.5 |
| 2016-2017                                                                                                          | 1.0                 | 91.8   | 89.9-93.7   | 92.7   | 90.8-94.6   | 80.0                         | 76.2 - 84.0 | 83.1   | 79.2 - 87.3 | 54.3                        | 46.3 - 63.7 | 60.8   | 51.9 - 71.2 |
| 2018-2019                                                                                                          | 1.0                 | 91.8   | 89.8-93.8   | 92.7   | 90.7-94.7   | 77.2                         | 73.4 - 81.2 | 80.1   | 76.1 - 84.2 | 56.0                        | 48.4 - 64.9 | 63.9   | 55.3 - 73.8 |
| 008-2009                                                                                                           | 3.0                 | 67.0   | 63.4-70.8   | 69.2   | 65.4-73.1   | 36.7                         | 31.9 - 42.3 | 42.6   | 37.1 - 49.0 | 9.0                         | 4.6 - 17.4  | 13.5   | 7.1 - 25.5  |
| 2010-2011                                                                                                          | 3.0                 | 69.4   | 66.1-72.9   | 71.7   | 68.3-75.2   | 37.1                         | 32.4 - 42.6 | 42.8   | 37.3 - 49.1 | 17.6                        | 11.7 - 26.5 | 26.0   | 17.4 - 38.8 |
| 2012-2013                                                                                                          | 3.0                 | 71.7   | 68.5-75.1   | 74.0   | 70.7-77.5   | 41.2                         | 36.2 - 46.9 | 47.6   | 41.8 - 54.2 | 19.3                        | 13.8 - 26.9 | 28.8   | 20.8 - 40.1 |
| 2014-2015                                                                                                          | 3.0                 | 73.2   | 70.1-76.4   | 75.6   | 72.4-78.9   | 48.9                         | 44.1 - 54.3 | 55.6   | 50.2 - 61.7 | 17.1                        | 11.6 - 25.2 | 24.9   | 17.0 - 36.5 |
| 2016-2017                                                                                                          | 3.0                 | 79.0   | 76.2-81.9   | 81.6   | 78.7-84.5   | 52.5                         | 47.8 - 57.6 | 59.7   | 54.4 - 65.5 | 22.0                        | 15.9 - 30.6 | 32.3   | 23.4 - 44.6 |
| 2018-2019                                                                                                          | 3.0                 | 79.4   | 76.0-82.9   | 82.1   | 78.6-85.7   | 51.1                         | 45.0 - 58.1 | 58.1   | 51.2 - 65.9 | 25.7                        | 18.6 - 35.5 | 37.1   | 27.0 - 50.9 |
| Danish patients <75 years                                                                                          |                     |        |             |        |             | Danish patients 75-84 years  |             |        |             | Danish patients ≥ 85 years  |             |        |             |
|                                                                                                                    | Survival at (years) | OS (%) | 95% CI (%)  | RS (%) | 95% CI (%)  | OS (%)                       | 95% CI (%)  | RS (%) | 95% CI (%)  | OS (%)                      | 95% CI (%)  | RS (%) | 95% CI (%)  |
| 2008-2009                                                                                                          | 0.5                 | 84.9   | 81.9 - 88.0 | 85.5   | 82.5 - 88.6 | 73.6                         | 68.3 - 79.3 | 75.8   | 70.3 - 81.7 | 67.2                        | 56.8 - 79.4 | 70.7   | 59.9 - 83.4 |
| 2010-2011                                                                                                          | 0.5                 | 88.0   | 85.5 - 90.6 | 88.6   | 86.1 - 91.3 | 75.0                         | 69.7 - 80.7 | 77.0   | 71.5 - 82.8 | 68.8                        | 58.3 - 81.1 | 72.8   | 61.8 - 85.8 |
| 2012-2013                                                                                                          | 0.5                 | 91.3   | 88.6 - 94.1 | 91.9   | 89.2 - 94.7 | 71.6                         | 65.1 - 78.7 | 73.5   | 66.9 - 80.8 | 46.8                        | 34.5 - 63.5 | 50.0   | 37.0 - 67.6 |
| 2014-2015                                                                                                          | 0.5                 | 92.0   | 89.5 - 94.6 | 92.6   | 90.1 - 95.2 | 80.1                         | 74.4 - 86.3 | 82.1   | 76.2 - 88.4 | 51.9                        | 40.1 - 67.0 | 55.7   | 43.3 - 71.8 |
| 2016-2017                                                                                                          | 0.5                 | 93.2   | 90.9 - 95.6 | 93.7   | 91.4 - 96.1 | 82.7                         | 77.9 - 87.9 | 84.8   | 79.8 - 90.1 | 63.3                        | 52.2 - 76.8 | 66.9   | 55.4 - 80.9 |
| 2018-2019                                                                                                          | 0.5                 | 94.4   | 92.5 - 96.2 | 95.0   | 93.1 - 96.9 | 79.4                         | 74.7 - 84.5 | 81.2   | 76.3 - 86.3 | 61.9                        | 52.3 - 73.2 | 66.8   | 56.5 - 79.0 |
| 008-2009                                                                                                           | 1.0                 | 80.7   | 77.4 - 84.1 | 81.8   | 78.5 - 85.3 | 63.4                         | 57.7 - 69.7 | 67.2   | 61.1 - 73.9 | 43.3                        | 32.9 - 56.9 | 49.8   | 37.9 - 65.5 |
| 2010-2011                                                                                                          | 1.0                 | 82.1   | 79.1 - 85.2 | 83.3   | 80.3 - 86.4 | 67.1                         | 61.4 - 73.3 | 70.9   | 64.9 - 77.5 | 54.7                        | 43.8 - 68.4 | 62.2   | 49.9 - 77.5 |
| 2012-2013                                                                                                          | 1.0                 | 86.5   | 83.3 - 89.9 | 87.7   | 84.4 - 91.1 | 63.9                         | 57.1 - 71.6 | 67.4   | 60.2 - 75.5 | 36.2                        | 24.7 - 52.9 | 39.6   | 27.2 - 57.6 |
| 2014-2015                                                                                                          | 1.0                 | 86.8   | 83.7 - 90.0 | 87.8   | 84.7 - 91.1 | 71.3                         | 64.9 - 78.5 | 74.7   | 68.0 - 82.2 | 37.0                        | 26.2 - 52.4 | 42.2   | 30.0 - 59.4 |
| 2016-2017                                                                                                          | 1.0                 | 90.5   | 87.8 - 93.2 | 91.5   | 88.8 - 94.3 | 73.6                         | 68.0 - 79.7 | 77.4   | 71.5 - 83.8 | 55.0                        | 43.7 - 69.1 | 61.2   | 48.8 - 76.9 |
| 2018-2019                                                                                                          | 1.0                 | 90.4   | 88.0 - 92.8 | 91.6   | 89.1 - 94.0 | 74.4                         | 69.3 - 80.0 | 78.0   | 72.6 - 83.8 | 50.3                        | 40.6 - 62.5 | 59.1   | 47.8 - 73.0 |
| 008-2009                                                                                                           | 3.0                 | 61.6   | 57.5 - 65.9 | 64.2   | 60.0 - 68.7 | 35.8                         | 30.3 - 42.3 | 42.9   | 36.2 - 50.8 | 19.4                        | 11.9 - 31.6 | 28.7   | 17.5 - 46.9 |
| 2010-2011                                                                                                          | 3.0                 | 62.9   | 59.2 - 66.8 | 65.7   | 61.8 - 69.8 | 37.1                         | 31.4 - 43.7 | 44.3   | 37.6 - 52.3 | 20.3                        | 12.5 - 33.0 | 31.1   | 19.1 - 50.7 |
| 2012-2013                                                                                                          | 3.0                 | 70.6   | 66.3 - 75.2 | 73.6   | 69.0 - 78.4 | 40.8                         | 34.1 - 49.0 | 48.2   | 40.2 - 57.8 | 19.1                        | 10.6 - 34.5 | 28.0   | 15.9 - 49.6 |
| 2014-2015                                                                                                          | 3.0                 | 70.8   | 66.7 - 75.2 | 73.6   | 69.3 - 78.2 | 45.0                         | 38.2 - 53.1 | 52.6   | 44.6 - 62.1 | 20.4                        | 12.0 - 34.5 | 32.5   | 19.4 - 54.5 |



|           |     |      |             |      |             |      |             |      |             |      |             |      |             |
|-----------|-----|------|-------------|------|-------------|------|-------------|------|-------------|------|-------------|------|-------------|
| 2016-2017 | 3.0 | 78.2 | 74.4 - 82.1 | 81.1 | 77.2 - 85.2 | 43.2 | 37.1 - 50.2 | 50.9 | 43.8 - 59.3 | 31.7 | 21.8 - 45.9 | 46.7 | 32.1 - 67.9 |
| 2018-2019 | 3.0 | 80.8 | 77.1 - 84.7 | 84.3 | 80.4 - 88.4 | 47.4 | 39.0 - 57.7 | 55.3 | 45.6 - 67.0 | 35.1 | 25.0 - 49.2 | 58.6 | 41.1 - 83.5 |
